# Supplementary material
Source: PubMed Central journal article supplement (PMC4357924)
Supplement: AEM.03096-14_zam999116158so1.pdf [file AEM.03096-14_zam999116158so1.pdf]

**Supplementary table 1** Chrysanthemum yellows phytoplasma (CYP) population in *Arabidopsis thaliana*, *Euscelidius variegatus*, and *Macrosteles quadripunctulatus* (mean CYP cell/100 mg leaf tissue  $\pm$  SEM).

Within rows different letters indicate significant differences (Tukey Test,  $P < 0,05$ ).

| Species                           | dpi/ dpa                      |                               |                                |                                |                                |                               | H value<br>Kruskal-<br>Wallis |
|-----------------------------------|-------------------------------|-------------------------------|--------------------------------|--------------------------------|--------------------------------|-------------------------------|-------------------------------|
|                                   | 7                             | 10                            | 14                             | 21                             | 28                             | 35                            |                               |
| <i>A. thaliana</i>                | -                             | 2.54E+07 $\pm$<br>7.34E+06, a | 2.27E+08 $\pm$<br>5.29E+07, a  | 1.45E+09 $\pm$<br>2.39E+08, b  | 1.29E+09 $\pm$<br>1.47E+08, b  | -                             | 32.036<br>(df=3;<br>P<0.001)  |
| <i>E. variegatus</i>              | 2.37E+04 $\pm$<br>1.19E+04, a | -                             | 5.42E+05 $\pm$<br>1.40E+05, ab | 1.34E+06 $\pm$<br>3.80E+05, bc | 2.10E+06 $\pm$<br>3.45E+05, bc | 3.90E+06 $\pm$<br>1.21E+06, c | 28.176<br>(df=4;<br>P<0.001)  |
| <i>M. quadri-<br/>punctulatus</i> | 8.53E+03 $\pm$<br>2.65E+03, a | -                             | 3.72E+05 $\pm$<br>2.12E+05, ab | 6.30E+06 $\pm$<br>8.84E+05, bc | 4.34E+06 $\pm$<br>2.28E+06, bc | 1.53E+07 $\pm$<br>3.88E+06, c | 31.087<br>(df=4;<br>P<0.001)  |

**Supplementary table 2** Mean expression index (EI) ± SEM and sample size (within brackets) of genes

grouped by functional category, measured at different days post inoculation (dpi) in *Arabidopsis thaliana*

samples. Within rows different letters indicate significant differences (P < 0,05) according to the appropriate all pairwise multiple comparison procedure.

| Functional category         | Gene name    | dpi                             |                                |                                |                                | H value<br>Kruskal-Wallis | Comparison procedure |
|-----------------------------|--------------|---------------------------------|--------------------------------|--------------------------------|--------------------------------|---------------------------|----------------------|
|                             |              | 10                              | 14                             | 21                             | 28                             |                           |                      |
| Antigenic membrane proteins | <i>amp</i>   | 5.68E+03 ±<br>3.01E+03 (10) a   | 3.29E+03 ±<br>1.04E+03 (10) a  | 5.31E+02 ±<br>1.80E+02 (10) ab | 1.51E+02 ±<br>2.05E+01 (10) b  | 19.523<br>(df=3; P<0.001) | Tukey Test           |
|                             | <i>imp</i>   | 5.42E+00 ±<br>2.71E+00 (10)     | 6.43E+00 ±<br>3.52E+00 (10)    | 1.32E+00 ±<br>5.05E-01 (10)    | 6.32E-01 ±<br>1.36E-01 (10)    | 5.435<br>(df=3; P=0.143)  | /                    |
| Generic transporters        | <i>mscL</i>  | 8.78E+02 ±<br>3.81E+02 (10) ab  | 6.55E+02 ±<br>2.68E+02 (10) a  | 1.02E+02 ±<br>4.06E+01 (10) ab | 3.30E+01 ±<br>4.99E+00 (10) b  | 14.349<br>(df=3; P=0.002) | Tukey Test           |
|                             | <i>mdlB</i>  | 3.20E+01 ±<br>1.36E+01 (10) ab  | 2.13E+01 ±<br>7.08E+00 (10) a  | 3.36E+00 ±<br>1.34E+00 (10) ab | 1.14E+00 ±<br>1.61E-01 (10) b  | 15.078<br>(df=3; P=0.002) | Tukey Test           |
|                             | <i>oppC</i>  | 1.24E+01 ±<br>5.35E+00 (10) a   | 4.76E+00 ±<br>1.84E+00 (10) a  | 2.27E-01 ±<br>7.52E-02 (10) b  | 6.58E-02 ±<br>6.91E-03 (10) b  | 27.642<br>(df=3; P<0.001) | Tukey Test           |
|                             | <i>ftsY</i>  | 1.36E+01 ±<br>6.10E+00 (10) a   | 8.21E+00 ±<br>3.13E+00 (10) a  | 1.11E+00 ±<br>4.06E-01 (10) ab | 3.06E-01 ±<br>4.51E-02 (10) b  | 19.032<br>(df=3; P<0.001) | Tukey Test           |
| Specific transporters       | <i>artI</i>  | 7.02E+00 ±<br>3.12E+00 (9) a    | 2.76E+00 ±<br>1.00E+00 (10) a  | 3.96E-01 ±<br>1.33E-01 (10) ab | 1.16E-01 ±<br>1.32E-02 (9) b   | 20.394<br>(df=3; P<0.001) | Dunn's Method        |
|                             | <i>zntA</i>  | 1.21E+01 ±<br>5.29E+00 (10) a   | 9.16E+00 ±<br>4.10E+00 (9) a   | 9.07E-01 ±<br>2.75E-01 (10) ab | 2.53E-01 ±<br>5.77E-02 (10) b  | 20.605<br>(df=3; P<0.001) | Dunn's Method        |
| Secreted proteins           | <i>SAP54</i> | 1.27E+02 ±<br>6.09E+01 (10) a   | 5.96E+01 ±<br>2.29E+01 (10) a  | 4.65E+00 ±<br>2.10E+00 (10) b  | 8.31E-01 ±<br>1.77E-01 (10) b  | 24.006<br>(df=3; P<0.001) | Tukey Test           |
|                             | <i>SAP67</i> | 4.12E+00 ±<br>1.80E+00 (10) ab  | 2.08E+00 ±<br>9.19E-01 (10) a  | 1.75E-01 ±<br>7.32E-02 (10) bc | 5.03E-02 ±<br>1.20E-02 (10) c  | 18.795<br>(df=3; P<0.001) | Tukey Test           |
|                             | <i>SAP68</i> | 2.33E+00 ±<br>9.80E-01 (10) ab  | 1.29E+00 ±<br>4.63E-01 (10) a  | 1.25E-01 ±<br>5.47E-02 (10) bc | 3.05E-02 ±<br>5.74E-03 (10) c  | 21.224<br>(df=3; P<0.001) | Tukey Test           |
|                             | <i>tengu</i> | 2.243E+03 ±<br>9.47E+02 (10) ab | 1.702E+03 ±<br>7.67E+02 (10) a | 4.168E+02 ±<br>1.48E+02 (9) ab | 9.443E+01 ±<br>1.57E+01 (10) b | 12.981<br>(df=3; P=0.005) | Dunn's Method        |
| Phospholipid metabolism     | <i>pgsA</i>  | 3.06E+00 ±<br>1.48E+00 (10) ab  | 2.05E+00 ±<br>6.48E-01 (10) a  | 3.37E-01 ±<br>1.57E-01 (10) b  | 1.06E-01 ±<br>1.66E-02 (10) b  | 13.989<br>(df=3; P=0.003) | Tukey Test           |
| 30S ribosomal subunit       | <i>rpsU</i>  | 1.30E+01 ±<br>5.71E+00 (10) a   | 9.94E+00 ±<br>3.74E+00 (10) a  | 1.67E+00 ±<br>5.26E-01 (10) ab | 5.05E-01 ±<br>7.99E-02 (10) b  | 19.848<br>(df=3; P<0.001) | Tukey Test           |

**Supplementary table 3** Mean expression index (EI) ± SEM and sample size (within brackets) of genes grouped by functional category, measured in *Euscelidius variegatus* individuals sampled at different days post acquisition (dpa). Within rows different letters indicate significant differences (P < 0,05) according to the all pairwise multiple comparison procedure (Dunn's Method).

| Functional category         | Gene name    | dpa             |                 |                 |                 |                 | H value<br>Kruskal-Wallis |
|-----------------------------|--------------|-----------------|-----------------|-----------------|-----------------|-----------------|---------------------------|
|                             |              | 7               | 14              | 21              | 28              | 35              |                           |
| Antigenic membrane proteins | <i>amp</i>   | 6.66E+02 ±      | 7.34E+02 ±      | 4.22E+02 ±      | 4.59E+02 ±      | 1.76E+02 ±      | 4.807                     |
|                             |              | 3.36E+02 (8)    | 4.47E+02 (8)    | 1.77E+02 (8)    | 1.60E+02 (8)    | 3.27E+01 (8)    | (df=4; P=0.308)           |
|                             | <i>imp</i>   | 3.70E+00 ±      | 2.17E+00 ±      | 1.53E+00 ±      | 2.31E+00 ±      | 1.12E+00 ±      | 4.080                     |
|                             |              | 1.65E+00 (6)    | 1.11E+00 (8)    | 6.10E-01 (8)    | 6.11E-01 (8)    | 1.74E-01 (8)    | (df=4; P=0.395)           |
| Generic transporters        | <i>mScL</i>  | 1.52E+01 ±      | 2.72E+01 ±      | 1.98E+01 ±      | 1.86E+01 ±      | 6.11E+00 ±      | 7.475                     |
|                             |              | 7.71E+00 (7)    | 1.59E+01 (8)    | 6.81E+00 (8)    | 4.82E+00 (8)    | 7.99E-01 (8)    | (df=4; P=0.113)           |
|                             | <i>mdlB</i>  | 2.61E+00 ±      | 3.20E+00 ±      | 2.22E+00 ±      | 2.47E+00 ±      | 1.15E+00 ±      | 5.064                     |
|                             |              | 9.84E-01 (6)    | 1.42E+00 (8)    | 8.78E-01 (8)    | 5.67E-01 (8)    | 1.98E-01 (8)    | (df=4; P=0.281)           |
|                             | <i>oppC</i>  | 9.19E-01 ±      | 6.25E-01 ±      | 5.39E-01 ±      | 7.63E-01 ±      | 3.81E-01 ±      | 4.367                     |
|                             |              | 3.05E-01 (6)    | 2.92E-01 (8)    | 2.34E-01 (8)    | 2.00E-01 (8)    | 1.00E-01 (8)    | (df=4; P=0.359)           |
| <i>ftsY</i>                 | 2.14E+00 ±   | 1.71E+00 ±      | 9.46E-01 ±      | 1.25E+00 ±      | 6.43E-01 ±      | 9.012           |                           |
|                             | 6.39E-01 (4) | 8.53E-01 (8)    | 4.36E-01 (8)    | 1.98E-01 (8)    | 1.70E-01 (8)    | (df=4; P=0.061) |                           |
| Specific transporters       | <i>artI</i>  | 1.10E-01 ±      | 4.14E-02 ±      | 4.26E-02 ±      | 1.08E-01 ±      | 2.05E-01 ±      | 9.857                     |
|                             |              | 7.08E-02 (6)    | 1.81E-02 (7)    | 2.94E-02 (8)    | 3.66E-02 (8)    | 4.05E-02 (8)    | (df=4; P=0.043)           |
|                             | <i>zntA</i>  | 2.23E+00 ±      | 2.23E+00 ±      | 1.73E+00 ±      | 1.29E+00 ±      | 6.66E-01 ±      | 10.733                    |
|                             |              | 6.32E-01 (5) a  | 4.71E-01 (8) a  | 5.42E-01 (8) ab | 3.69E-01 (8) ab | 1.42E-01 (8) b  | (df=4; P=0.030)           |
| Secreted proteins           | <i>SAP54</i> | 3.12E+01 ±      | 1.25E+01 ±      | 4.53E+00 ±      | 4.67E+00 ±      | 2.08E+00 ±      | 10.723                    |
|                             |              | 1.67E+01 (7) a  | 5.24E+00 (8) ab | 2.01E+00 (8) ab | 1.83E+00 (8) ab | 3.74E-01 (8) b  | (df=4; P=0.030)           |
|                             | <i>SAP67</i> | 3.02E+00 ±      | 1.95E+00 ±      | 1.18E+00 ±      | 1.23E+00 ±      | 6.11E-01 ±      | 6.669                     |
|                             |              | 1.45E+00 (4)    | 8.60E-01 (8)    | 4.93E-01 (7)    | 2.75E-01 (8)    | 1.10E-01 (8)    | (df=4; P=0.154)           |
|                             | <i>SAP68</i> | 2.79E+00 ±      | 1.45E+00 ±      | 8.50E-01 ±      | 9.08E-01 ±      | 4.77E-01 ±      | 8.409                     |
|                             |              | 1.11E+00 (5)    | 5.00E-01 (8)    | 3.73E-01 (8)    | 2.54E-01 (8)    | 7.63E-02 (8)    | (df=4; P=0.078)           |
| <i>tengu</i>                | 2.12E+02 ±   | 1.75E+02 ±      | 7.08E+01 ±      | 7.74E+01 ±      | 2.91E+01 ±      | 8.850           |                           |
|                             | 1.14E+02 (8) | 8.70E+01 (8)    | 2.81E+01 (8)    | 2.97E+01 (8)    | 4.42E+00 (8)    | (df=4; P=0.065) |                           |
| Phospholipid metabolism     | <i>pgsA</i>  | 1.68E+00 ±      | 2.45E+00 ±      | 1.90E+00 ±      | 1.16E+00 ±      | 5.09E-01 ±      | 13.763                    |
|                             |              | 5.18E-01 (5) ab | 8.70E-01 (8) a  | 6.52E-01 (8) ab | 2.99E-01 (8) ab | 1.04E-01 (8) b  | (df=4; P=0.008)           |
| 30S ribosomal subunit       | <i>rpsU</i>  | 4.38E+00 ±      | 2.40E+00 ±      | 2.91E+00 ±      | 4.07E+00 ±      | 2.26E+00 ±      | 7.476                     |
|                             |              | 1.00E+00 (6)    | 9.90E-01 (8)    | 1.10E+00 (8)    | 1.06E+00 (8)    | 4.12E-01 (8)    | (df=4; P=0.113)           |

**Supplementary table 4** Mean expression index (EI) ± SEM and sample size (within brackets) of genes grouped by functional category, measured in *Macrosteles quadripunctulatus* individuals sampled at different days post acquisition (dpa). Within rows different letters indicate significant differences (P < 0,05) according to the appropriate all pairwise multiple comparison procedure.

| Functional category         | Gene name    | dpa                              |                                  |                                   |                                   |                              | H value<br>Kruskal-Wallis | Comparison procedure |
|-----------------------------|--------------|----------------------------------|----------------------------------|-----------------------------------|-----------------------------------|------------------------------|---------------------------|----------------------|
|                             |              | 7                                | 14                               | 21                                | 28                                | 35                           |                           |                      |
| Antigenic membrane proteins | <i>amp</i>   | 2.62E+02 ±<br>4.32E+01 (8)<br>a  | 1.84E+02 ±<br>4.02E+01 (8)<br>ab | 5.80E+01 ±<br>1.17E+01 (8)<br>abc | 5.84E+01 ±<br>3.35E+01 (8)<br>bc  | 1.55E+01 ±<br>6.44E+00 (8) c | 23.621<br>(df=4; P<0.001) | Tukey Test           |
|                             | <i>imp</i>   | 6.19E-01 ±<br>1.37E-01 (8)<br>a  | 2.99E-01 ±<br>6.99E-02 (8)<br>ab | 1.61E-01 ±<br>3.40E-02 (8)<br>abc | 1.49E-01 ±<br>8.82E-02 (8)<br>bc  | 5.26E-02 ±<br>1.84E-02 (8) c | 23.373<br>(df=4; P<0.001) | Tukey Test           |
| Generic transporters        | <i>mscL</i>  | 1.15E+01 ±<br>3.91E+00 (7)<br>ab | 1.84E+01 ±<br>3.47E+00 (8)<br>a  | 8.86E+00 ±<br>1.71E+00 (8)<br>abc | 3.29E+00 ±<br>1.10E+00 (8)<br>bc  | 1.60E+00 ±<br>2.81E-01 (8) c | 22.239<br>(df=4; P<0.001) | Dunn's Method        |
|                             | <i>mdlB</i>  | 9.17E-01 ±<br>2.08E-01 (8)<br>a  | 5.90E-01 ±<br>1.28E-01 (8)<br>ab | 2.23E-01 ±<br>5.11E-02 (8)<br>abc | 3.36E-01 ±<br>2.10E-01 (8)<br>b   | 9.67E-02 ±<br>3.57E-02 (8) c | 21.205<br>(df=4; P<0.001) | Tukey Test           |
|                             | <i>oppC</i>  | 1.23E-01 ±<br>2.72E-02 (8)<br>a  | 7.25E-02 ±<br>1.67E-02 (8)<br>ab | 5.15E-02 ±<br>1.79E-02 (8)<br>ab  | 1.17E-01 ±<br>6.74E-02 (8)<br>ab  | 2.88E-02 ±<br>1.06E-02 (8) b | 11.965<br>(df=4; P=0.018) | Tukey Test           |
|                             | <i>ftsY</i>  | 3.96E-01 ±<br>7.93E-02 (7)<br>a  | 2.44E-01 ±<br>5.08E-02 (8)<br>a  | 1.10E-01 ±<br>2.45E-02 (8)<br>ab  | 1.85E-01 ±<br>1.16E-01 (8)<br>ab  | 5.43E-02 ±<br>2.23E-02 (8) b | 20.076<br>(df=4; P<0.001) | Dunn's Method        |
| Specific transporters       | <i>artI</i>  | 9.17E-02 ±<br>2.27E-02 (8)<br>a  | 3.39E-02 ±<br>6.74E-03 (8)<br>ab | 2.30E-02 ±<br>1.17E-02 (8)<br>ab  | 6.14E-02 ±<br>3.01E-02 (8)<br>ab  | 1.82E-02 ±<br>6.70E-03 (8) b | 10.248<br>(df=4; P=0.036) | Tukey Test           |
|                             | <i>zntA</i>  | 1.53E-01 ±<br>2.58E-02 (7)<br>a  | 8.54E-02 ±<br>1.35E-02 (8)<br>ab | 2.53E-02 ±<br>5.64E-03 (8)<br>b   | 6.51E-02 ±<br>3.37E-02 (8)<br>abc | 1.43E-02 ±<br>4.65E-03 (8) c | 23.546<br>(df=4; P<0.001) | Dunn's Method        |
| Secreted proteins           | <i>SAP54</i> | 3.88E+00 ±<br>8.71E-01 (8)<br>a  | 1.67E+00 ±<br>3.92E-01 (8)<br>ab | 5.10E-01 ±<br>1.20E-01 (8)<br>bc  | 6.09E-01 ±<br>3.35E-01 (8)<br>bc  | 2.26E-01 ±<br>9.39E-02 (8) c | 26.385<br>(df=4; P<0.001) | Tukey Test           |
|                             | <i>SAP67</i> | 7.70E-01 ±<br>2.35E-01 (6)<br>a  | 1.35E-01 ±<br>2.59E-02 (8)<br>ab | 5.07E-02 ±<br>1.17E-02 (8)<br>bc  | 1.24E-01 ±<br>5.79E-02 (7)<br>abc | 2.32E-02 ±<br>4.74E-03 (7) c | 23.463<br>(df=4; P<0.001) | Dunn's Method        |
|                             | <i>SAP68</i> | 4.24E-01 ±<br>1.87E-01 (8)<br>a  | 4.63E-02 ±<br>8.96E-03 (8)<br>ab | 2.82E-02 ±<br>6.17E-03 (8)<br>b   | 4.88E-02 ±<br>2.87E-02 (7)<br>b   | 9.92E-03 ±<br>2.59E-03 (8) b | 23.675<br>(df=4; P<0.001) | Dunn's Method        |
|                             | <i>tengu</i> | 8.61E+01 ±<br>3.78E+01 (8)<br>a  | 3.01E+01 ±<br>7.03E+00 (8)<br>ab | 1.04E+01 ±<br>2.97E+00 (8)<br>abc | 8.46E+00 ±<br>4.79E+00 (8)<br>bc  | 2.83E+00 ±<br>1.02E+00 (8) c | 26.766<br>(df=4; P<0.001) | Tukey Test           |
| General metabolism          | <i>pgsA</i>  | 7.52E-01 ±<br>1.61E-01 (7)<br>a  | 3.31E-01 ±<br>5.83E-02 (8)<br>ab | 1.10E-01 ±<br>2.10E-02 (8)<br>abc | 1.11E-01 ±<br>7.46E-02 (8)<br>bc  | 2.22E-02 ±<br>7.03E-03 (8) c | 28.649<br>(df=4; P<0.001) | Dunn's Method        |
|                             | <i>rpsU</i>  | 2.19E+00 ±<br>3.96E-01 (8)<br>a  | 7.58E-01 ±<br>1.26E-01 (8)<br>ab | 3.39E-01 ±<br>7.33E-02 (8)<br>b   | 9.01E-01 ±<br>4.95E-01 (8)<br>ab  | 3.54E-01 ±<br>1.43E-01 (8) b | 20.149<br>(df=4; P<0.001) | Tukey Test           |

**Supplementary Table 5** Mean expression index (EI)  $\pm$  SEM and sample size (within brackets) of genes grouped by functional category, measured in *Arabidopsis thaliana*, *Euscelidius variegatus* and *Macrosteles quadripunctulatus* sampled at the first two dates (10 and 14 days post inoculation and 7 and 14 days post acquisition for plant and insect samples, respectively). Within rows different letters indicate significant differences ( $P < 0,05$ ) according to the all pairwise multiple comparison procedure (Dunn's Method).

| Functional category               | Gene name        | <i>Arabidopsis thaliana</i> | <i>Euscelidius variegatus</i> | <i>Macrosteles quadripunctulatus</i> | H value<br>Kruskal-Wallis |
|-----------------------------------|------------------|-----------------------------|-------------------------------|--------------------------------------|---------------------------|
| Immuno-dominant membrane proteins | <i>amp</i>       | 4.49E+03 $\pm$              | 7.00E+02 $\pm$                | 2.23E+02 $\pm$                       | 19.645                    |
|                                   |                  | 1.58E+03 (20) a             | 2.70E+02 (16) b               | 3.02E+01 (16) b                      | (df=2; <0.001)            |
|                                   | <i>imp</i>       | 5.92E+00 $\pm$              | 2.82E+00 $\pm$                | 4.59E-01 $\pm$                       | 11.304                    |
|                                   |                  | 2.17E+00 (20) a             | 9.34E-01 (14) a               | 8.48E-02 (16) b                      | (df=2; P=0.004)           |
| Generic transporters              | <i>mscL</i>      | 7.67E+02 $\pm$              | 2.16E+01 $\pm$                | 1.52E+01 $\pm$                       | 28.063                    |
|                                   |                  | 2.28E+02 (20) a             | 9.07E+00 (15) b               | 2.67E+00 (15) b                      | (df=2; P<0.001)           |
|                                   | <i>mdlB</i>      | 2.66E+01 $\pm$              | 2.95E+00 $\pm$                | 7.54E-01 $\pm$                       | 24.166                    |
|                                   |                  | 7.56E+00 (20) a             | 8.85E-01 (14) ab              | 1.25E-01 (16) b                      | (df=2; P<0.001)           |
|                                   | <i>oppC</i>      | 8.57E+00 $\pm$              | 7.51E-01 $\pm$                | 9.79E-02 $\pm$                       | 24.166                    |
|                                   | 2.89E+00 (20) a  | 2.08E-01 (14) a             | 1.67E-02 (16) b               | (df=2; P<0.001)                      |                           |
| Specific transporters             | <i>ftsY</i>      | 1.09E+01 $\pm$              | 1.86E+00 $\pm$                | 3.15E-01 $\pm$                       | 22.606                    |
|                                   |                  | 3.39E+00 (20) a             | 5.91E-01 (12) a               | 4.86E-02 (15) b                      | (df=2; P<0.001)           |
|                                   | <i>artI</i>      | 4.78E+00 $\pm$              | 7.30E-02 $\pm$                | 6.28E-02 $\pm$                       | 31.650                    |
|                                   | 1.60E+00 (19) a  | 3.39E-02 (13) b             | 1.36E-02 (16) b               | (df=2; P<0.001)                      |                           |
| Secreted proteins                 | <i>zntA</i>      | 1.07E+01 $\pm$              | 2.23E+00 $\pm$                | 1.17E-01 $\pm$                       | 30.914                    |
|                                   |                  | 3.32E+00 (19) a             | 3.61E-01 (13) a               | 1.62E-02 (15) b                      | (df=2; P<0.001)           |
|                                   | <i>SAP54</i>     | 9.33E+01 $\pm$              | 2.12E+01 $\pm$                | 2.77E+00 $\pm$                       | 22.397                    |
|                                   |                  | 3.26E+01 (20) a             | 8.33E+00 (15) a               | 5.43E-01 (16) b                      | (df=2; P<0.001)           |
|                                   | <i>SAP67</i>     | 3.10E+00 $\pm$              | 2.31E+00 $\pm$                | 4.07E-01 $\pm$                       | 8.709                     |
|                                   | 1.01E+00 (20) ab | 7.26E-01 (12) a             | 1.30E-01 (14) b               | (df=2; P=0.013)                      |                           |
|                                   | <i>SAP68</i>     | 1.81E+00 $\pm$              | 1.97E+00 $\pm$                | 2.35E-01 $\pm$                       | 16.225                    |
|                                   |                  | 5.41E-01 (20) a             | 5.32E-01 (13) a               | 1.03E-01 (16) b                      | (df=2; P<0.001)           |
|                                   | <i>tengu</i>     | 1.97E+03 $\pm$              | 1.94E+02 $\pm$                | 5.81E+01 $\pm$                       | 22.206                    |
|                                   |                  | 5.96E+02 (20) a             | 6.95E+01 (16) b               | 1.99E+01 (16) b                      | (df=2; P<0.001)           |
| General metabolism                | <i>pgsA</i>      | 2.56E+00 $\pm$              | 2.16E+00 $\pm$                | 5.27E-01 $\pm$                       | 10.260                    |
|                                   |                  | 7.95E-01 (20) ab            | 5.64E-01 (13) a               | 9.63E-02 (15) b                      | (df=2; P=0.006)           |
|                                   | <i>rpsU</i>      | 1.15E+01 $\pm$              | 3.25E+00 $\pm$                | 1.47E+00 $\pm$                       | 10.282                    |
|                                   |                  | 3.34E+00 (20) a             | 7.35E-01 (14) ab              | 2.73E-01 (16) b                      | (df=2; P=0.006)           |
